# Supplementary material for: An outlier removal method based on PCA-DBSCAN for blood-SERS data analysis
Source: Royal Society of Chemistry journal article supplement (doi:10.1039/d3ay02037a), 2024-01-01
Supplement: d3ay02037a1.pdf [file d3ay02037a1.pdf]

## Supplemental Information

### An outlier removal method based on PCA-DBSCAN for blood-SERS data analysis

Miaomiao Liu,<sup>a</sup> Tingyin Wang,<sup>\*a</sup> Qiyi Zhang,<sup>a</sup> Changbin Pan,<sup>a</sup> Shuhang Liu,<sup>a</sup> Yuanmei Chen,<sup>\*b</sup> Duo Lin,<sup>a</sup> and Shangyuan Feng<sup>\*a</sup>

<sup>a</sup> Key Laboratory of OptoElectronic Science and Technology for Medicine of Ministry of Education, Fujian Provincial Key Laboratory of Photonics Technology, Fujian Normal University, Fuzhou, 350117, China. Email: [tywang@fjnu.edu.cn](mailto:tywang@fjnu.edu.cn); [syfeng@fjnu.edu.cn](mailto:syfeng@fjnu.edu.cn)

<sup>b</sup> Clinical Oncology School of Fujian Medical University, Fujian Cancer Hospital, Fuzhou, Fujian, 350001, China. Email: [chenym091@hotmail.com](mailto:chenym091@hotmail.com)

Table S1 Results summary for KNN classifier

| Classifier: K-Nearest Neighbors (KNN) |        |               |               |               |               |
|---------------------------------------|--------|---------------|---------------|---------------|---------------|
| Eps                                   | MinPts | Accuracy      | Precision     | Recall        | F1-score      |
|                                       |        | 0.8907        | 0.9073        | 0.8871        | 0.8953        |
|                                       | 4      | <b>0.9765</b> | <b>0.9814</b> | <b>0.9741</b> | <b>0.9774</b> |
| 0.0004                                | 6      | 0.9571        | 0.9648        | 0.9314        | 0.9451        |
|                                       | 8      | 0.9463        | 0.9675        | 0.9406        | 0.9514        |
|                                       | 4      | 0.9602        | 0.9675        | 0.9457        | 0.9548        |
| 0.0006                                | 6      | 0.9540        | 0.9639        | 0.9465        | 0.9540        |
|                                       | 8      | 0.9598        | 0.9665        | 0.9444        | 0.9536        |
|                                       | 4      | 0.9162        | 0.9314        | 0.9014        | 0.9131        |
| 0.0008                                | 6      | 0.9101        | 0.9272        | 0.8911        | 0.9045        |
|                                       | 8      | 0.9213        | 0.9368        | 0.9049        | 0.9173        |
|                                       | 4      | 0.9050        | 0.9245        | 0.8843        | 0.8987        |
| 0.001                                 | 6      | 0.9050        | 0.9245        | 0.8843        | 0.8987        |
|                                       | 8      | 0.9274        | 0.9407        | 0.9150        | 0.9254        |
|                                       | 4      | 0.8889        | 0.9114        | 0.8711        | 0.8855        |
| 0.0012                                | 6      | 0.8889        | 0.9114        | 0.8711        | 0.8855        |
|                                       | 8      | 0.8889        | 0.9114        | 0.8711        | 0.8855        |
|                                       | 4      | 0.9006        | 0.9199        | 0.8884        | 0.9005        |
| 0.0014                                | 6      | 0.8889        | 0.9114        | 0.8711        | 0.8855        |
|                                       | 8      | 0.8889        | 0.9114        | 0.8711        | 0.8855        |
|                                       | 4      | 0.9006        | 0.9215        | 0.8850        | 0.8985        |
| 0.0016                                | 6      | 0.9006        | 0.9215        | 0.8850        | 0.8985        |
|                                       | 8      | 0.9056        | 0.9235        | 0.8928        | 0.9047        |

Table S2 Results summary for SVM classifier

| Classifier: Support Vector Machine (SVM) |        |               |               |               |               |
|------------------------------------------|--------|---------------|---------------|---------------|---------------|
| Eps                                      | MinPts | Accuracy      | Precision     | Recall        | F1_score      |
|                                          |        | 0.8234        | 0.8918        | 0.8450        | 0.8604        |
| 0.0004                                   | 4      | <b>0.8824</b> | 0.9247        | 0.8551        | <b>0.8782</b> |
|                                          | 6      | 0.8405        | 0.9133        | 0.7605        | 0.7929        |
|                                          | 8      | 0.8725        | <b>0.9319</b> | 0.8216        | 0.8588        |
| 0.0006                                   | 4      | 0.8807        | 0.9193        | <b>0.8557</b> | 0.8760        |
|                                          | 6      | 0.8793        | 0.9224        | 0.8451        | 0.8684        |
|                                          | 8      | 0.8678        | 0.9134        | 0.8345        | 0.8579        |
| 0.0008                                   | 4      | 0.8324        | 0.8798        | 0.7977        | 0.8195        |
|                                          | 6      | 0.8315        | 0.8792        | 0.7943        | 0.8168        |
|                                          | 8      | 0.8652        | 0.9009        | 0.8469        | 0.8645        |
| 0.001                                    | 4      | 0.8268        | 0.8738        | 0.7891        | 0.8105        |
|                                          | 6      | 0.8268        | 0.8738        | 0.7891        | 0.8105        |
|                                          | 8      | 0.8380        | 0.8859        | 0.8062        | 0.8283        |
| 0.0012                                   | 4      | 0.8444        | 0.8742        | 0.8110        | 0.8285        |
|                                          | 6      | 0.8444        | 0.8742        | 0.8110        | 0.8285        |
|                                          | 8      | 0.8444        | 0.8742        | 0.8110        | 0.8285        |
| 0.0014                                   | 4      | 0.8453        | 0.8782        | 0.8185        | 0.8359        |
|                                          | 6      | 0.8444        | 0.8742        | 0.8110        | 0.8285        |
|                                          | 8      | 0.8444        | 0.8742        | 0.8110        | 0.8285        |
| 0.0016                                   | 4      | 0.8453        | 0.8777        | 0.8151        | 0.8329        |
|                                          | 6      | 0.8453        | 0.8691        | 0.8156        | 0.8315        |
|                                          | 8      | 0.8556        | 0.8840        | 0.8276        | 0.8447        |

Table S3 Results summary for Random Forest classifier

| Classifier: Random Forest |          |               |               |               |               |
|---------------------------|----------|---------------|---------------|---------------|---------------|
| Eps                       | MinPts   | Accuracy      | Precision     | Recall        | F1_score      |
|                           |          | 0.9118        | 0.9147        | 0.8906        | 0.8997        |
| 0.0004                    | 4        | 0.9118        | 0.9147        | 0.8906        | 0.8997        |
|                           | 6        | 0.8528        | 0.9148        | 0.7657        | 0.7936        |
|                           | 8        | 0.8792        | 0.8678        | 0.8376        | 0.8502        |
| 0.0006                    | 4        | 0.8977        | 0.9240        | 0.8891        | 0.9004        |
|                           | <b>6</b> | <b>0.9195</b> | <b>0.9470</b> | <b>0.8925</b> | <b>0.9113</b> |
|                           | 8        | 0.8793        | 0.8861        | 0.8779        | 0.8781        |
| 0.0008                    | 4        | 0.7486        | 0.7419        | 0.7239        | 0.7304        |
|                           | 6        | 0.8933        | 0.9163        | 0.8525        | 0.8705        |
|                           | 8        | 0.8539        | 0.8364        | 0.8327        | 0.8338        |
| 0.001                     | 4        | 0.8603        | 0.8993        | 0.8154        | 0.8355        |
|                           | 6        | 0.8715        | 0.9074        | 0.8465        | 0.8655        |
|                           | 8        | 0.8045        | 0.8805        | 0.7439        | 0.7623        |
| 0.0012                    | 4        | 0.8889        | 0.9255        | 0.8634        | 0.8827        |
|                           | 6        | 0.8444        | 0.8776        | 0.8225        | 0.8403        |
|                           | 8        | 0.8889        | 0.9164        | 0.8607        | 0.8782        |
| 0.0014                    | 4        | 0.8840        | 0.8890        | 0.8605        | 0.8706        |
|                           | 6        | 0.8278        | 0.8356        | 0.8117        | 0.8195        |
|                           | 8        | 0.8389        | 0.8535        | 0.8037        | 0.8183        |
| 0.0016                    | 4        | 0.8674        | 0.8798        | 0.8417        | 0.8541        |
|                           | 6        | 0.8785        | 0.8963        | 0.8694        | 0.8795        |
|                           | 8        | 0.8778        | 0.8866        | 0.8561        | 0.8672        |

Table S4 Results summary for Adaboost classifier

| Classifier: Adaboost |        |               |               |               |               |
|----------------------|--------|---------------|---------------|---------------|---------------|
| Eps                  | MinPts | Accuracy      | Precision     | Recall        | F1_score      |
|                      |        | 0.7869        | 0.8371        | 0.7551        | 0.7767        |
| 0.0004               | 4      | 0.8294        | 0.8972        | 0.8263        | 0.8383        |
|                      | 6      | 0.9632        | 0.9591        | 0.9489        | 0.9534        |
|                      | 8      | 0.7584        | 0.8768        | 0.7550        | 0.7569        |
| 0.0006               | 4      | 0.9205        | 0.9152        | 0.9277        | 0.9196        |
|                      | 6      | 0.9598        | 0.9552        | 0.9542        | 0.9546        |
|                      | 8      | <b>0.9655</b> | <b>0.9688</b> | <b>0.9542</b> | <b>0.9607</b> |
| 0.0008               | 4      | 0.9162        | 0.9263        | 0.9122        | 0.9167        |
|                      | 6      | 0.8989        | 0.9065        | 0.8890        | 0.8948        |
|                      | 8      | 0.8708        | 0.8951        | 0.8722        | 0.8806        |
| 0.001                | 4      | 0.9218        | 0.9274        | 0.9289        | 0.9239        |
|                      | 6      | 0.9106        | 0.9156        | 0.9118        | 0.9102        |
|                      | 8      | 0.9274        | 0.9382        | 0.9293        | 0.9304        |
| 0.0012               | 4      | 0.9278        | 0.9310        | 0.9289        | 0.9292        |
|                      | 6      | 0.9278        | 0.9310        | 0.9289        | 0.9292        |
|                      | 8      | 0.9278        | 0.9310        | 0.9289        | 0.9292        |
| 0.0014               | 4      | 0.7459        | 0.8209        | 0.7605        | 0.7594        |
|                      | 6      | 0.9333        | 0.9396        | 0.9334        | 0.9357        |
|                      | 8      | 0.9278        | 0.9350        | 0.9250        | 0.9291        |
| 0.0016               | 4      | 0.8785        | 0.9117        | 0.8915        | 0.8892        |
|                      | 6      | 0.8508        | 0.8716        | 0.8210        | 0.8366        |
|                      | 8      | 0.9278        | 0.9328        | 0.9267        | 0.9293        |

Table S5 Results summary for GNB classifier

| Classifier: Gaussian Naive Bayes |        |               |               |               |               |
|----------------------------------|--------|---------------|---------------|---------------|---------------|
| Eps                              | MinPts | Accuracy      | Precision     | Recall        | F1_score      |
|                                  |        | 85.79         | 86.10         | 85.86         | 85.81         |
| 0.0004                           | 4      | <b>0.9176</b> | 0.9125        | <b>0.9183</b> | 0.9128        |
|                                  | 6      | 0.8896        | 0.9083        | 0.8525        | 0.8722        |
|                                  | 8      | 0.8792        | 0.8949        | 0.8437        | 0.8645        |
| 0.0006                           | 4      | 0.9148        | <b>0.9173</b> | 0.9169        | <b>0.9151</b> |
|                                  | 6      | 0.8851        | 0.8826        | 0.8758        | 0.8780        |
|                                  | 8      | 0.8851        | 0.8756        | 0.8758        | 0.8746        |
| 0.0008                           | 4      | 0.8994        | 0.9047        | 0.9043        | 0.9021        |
|                                  | 6      | 0.8989        | 0.9039        | 0.9038        | 0.9015        |
|                                  | 8      | 0.8933        | 0.8960        | 0.8993        | 0.8952        |
| 0.001                            | 4      | 0.8771        | 0.8854        | 0.8701        | 0.8752        |
|                                  | 6      | 0.8771        | 0.8854        | 0.8701        | 0.8752        |
|                                  | 8      | 0.8883        | 0.8961        | 0.8872        | 0.8891        |
| 0.0012                           | 4      | 0.8944        | 0.8968        | 0.8931        | 0.8931        |
|                                  | 6      | 0.8944        | 0.8968        | 0.8931        | 0.8931        |
|                                  | 8      | 0.8944        | 0.8968        | 0.8931        | 0.8931        |
| 0.0014                           | 4      | 0.8895        | 0.8982        | 0.8957        | 0.8934        |
|                                  | 6      | 0.8944        | 0.8968        | 0.8931        | 0.8931        |
|                                  | 8      | 0.8944        | 0.8968        | 0.8931        | 0.8931        |
| 0.0016                           | 4      | 0.8840        | 0.8873        | 0.8912        | 0.8856        |
|                                  | 6      | 0.8950        | 0.8951        | 0.9011        | 0.8956        |
|                                  | 8      | 0.9056        | 0.9093        | 0.9098        | 0.9077        |

DBSCAN operates by defining a neighbourhood around each data point and identifying core points, which have enough neighbouring points within a specified distance (Eps). It then expands the clusters by connecting core points to their density-reachable neighbors.<sup>36</sup> The key parameters of DBSCAN are the distance threshold (Eps) and the minimum number of points required to form a core point (MinPts). These parameters influence the cluster formation and can be adjusted based on the characteristics of the dataset. Assuming the spectral data sample set is defined as  $D = (s_1, s_2, \dots, s_m)$ , the density concepts involved in DBSCAN are defined as follows:

(1) Eps-Neighbourhood: For a sample  $s_j \in D$ , its  $\epsilon$ -neighbourhood contains a subset of samples from the dataset  $D$  that are at a distance less than or equal to Eps from  $s_j$ , denoted as  $Ne(s_j) = \{s_i \in D | \text{distance}(s_i, s_j) \leq \epsilon\}$ . The number of samples in this subset is denoted as  $|Ne(s_j)|$ .

(2) Core Object: For a sample  $s_j \in D$ , if its  $\epsilon$ -neighbourhood corresponding to  $Ne(s_j)$  contains at least MinPts samples, i.e.,  $|Ne(s_j)| \geq \text{MinPts}$ , then  $s_j$  is considered a core object.

(3) Density direct: If a sample  $s_i$  is located in the  $\epsilon$ -neighbourhood of sample  $s_j$ , and  $s_j$  is a core object, then  $s_i$  is said to be directly reached by the density of  $s_j$ .

(4) Density reachable: For samples  $s_i$  and  $s_j$ , if there exists a sample sequence  $p_1, p_2, \dots, p_T$  satisfying that  $p_1 = s_i$ ,  $p_T = s_j$ , and  $p_{T+1}$  is directly reached by  $p_T$  in terms of density, then  $s_j$  is considered reachable by the density of  $s_i$ .

(5) Density connectivity: For samples  $s_i$  and  $s_j$ , if there exists a core object sample  $s_k$  such that both  $s_i$  and  $s_j$  are reachable by the density of  $s_k$ , then  $s_i$  and  $s_j$  are considered density-connected.
